# Supplementary material for: Discovery of prenylated flavonoids with dual activity against influenza virus and Streptococcus pneumoniae
Source: PubMed Central journal article supplement (PMC4891693; doi:10.1038/srep27156), 2016-06-03
Supplement: srep27156-s2.pdf [file srep27156-s2.pdf]

Supporting Information to

*Discovery of prenylated flavonoids with dual  
activity against influenza virus and Streptococcus  
pneumoniae*

Ulrike Grienke<sup>1+</sup>, Martina Richter<sup>2+</sup>, Elisabeth Walther<sup>2</sup>, Anja Hoffmann<sup>2</sup>, Johannes Kirchmair<sup>3</sup>, Vadim Makarov<sup>4</sup>, Sandor Nietzsche<sup>5</sup>, Michaela Schmidtke<sup>2\*</sup>, Judith M. Rollinger<sup>1\*</sup>

<sup>1</sup> Department of Pharmacognosy, Faculty of Life Sciences, University of Vienna, Althanstraße 14, 1090 Vienna, Austria

<sup>2</sup> Jena University Hospital, Department of Virology and Antiviral Therapy, Hans-Knoell-Strasse 2, 07745 Jena, Germany

<sup>3</sup> University of Hamburg, Center for Bioinformatics, Bundesstrasse 43, 20146 Hamburg, Germany

<sup>4</sup> A.N. Bakh Institute of Biochemistry RAS, Leninsky prospekt, 33, build. 2, Moscow, 119071, Russia

<sup>5</sup> Jena University Hospital, Center of Electron Microscopy, Ziegelmuehlenweg 1, 07743 Jena, Germany

**Table S1. Self-fluorescence or quenching of test compounds.**

|                                          | code      | sample concentrations                                         |                 |
|------------------------------------------|-----------|---------------------------------------------------------------|-----------------|
|                                          |           | [ $\mu\text{M}$ ; extract/fraction in $\mu\text{g/mL}$ ] with |                 |
|                                          |           | self-fluorescence <sup>a</sup>                                | quenching       |
| multi-<br>component<br>mixtures          | MAE       | 100                                                           | no <sup>a</sup> |
|                                          | MAF       | > 1                                                           | no <sup>a</sup> |
| natural product<br>isolates              | <b>1</b>  | > 10                                                          | no <sup>a</sup> |
|                                          | <b>2</b>  | > 10                                                          | no <sup>a</sup> |
|                                          | <b>3</b>  | > 1                                                           | no <sup>a</sup> |
|                                          | <b>4</b>  | > 10                                                          | no <sup>a</sup> |
|                                          | <b>5</b>  | > 10                                                          | no <sup>a</sup> |
|                                          | <b>6</b>  | > 1                                                           | no <sup>a</sup> |
|                                          | <b>7</b>  | > 1                                                           | no <sup>a</sup> |
| non-prenylated<br>congeners of <b>5</b>  | <b>8</b>  | no                                                            | no <sup>b</sup> |
|                                          | <b>9</b>  | > 1                                                           | no <sup>b</sup> |
|                                          | <b>10</b> | > 1                                                           | no <sup>b</sup> |
|                                          | <b>11</b> | 100                                                           | no <sup>b</sup> |
|                                          | <b>12</b> | > 1                                                           | no <sup>b</sup> |
|                                          | <b>13</b> | 100                                                           | no <sup>b</sup> |
|                                          | <b>14</b> | > 1                                                           | no <sup>b</sup> |
|                                          | <b>15</b> | no                                                            | no <sup>b</sup> |
|                                          | <b>16</b> | > 1                                                           | no <sup>b</sup> |
|                                          | <b>17</b> | no                                                            | no <sup>b</sup> |
| mono-prenylated<br>congeners of <b>5</b> | <b>18</b> | no                                                            | no <sup>b</sup> |
|                                          | <b>19</b> | no                                                            | no <sup>b</sup> |
|                                          | <b>20</b> | no                                                            | no <sup>b</sup> |
|                                          | <b>21</b> | 100                                                           | no <sup>b</sup> |
|                                          | <b>22</b> | no                                                            | no <sup>b</sup> |
|                                          | <b>23</b> | no                                                            | no <sup>b</sup> |
| di-prenylated<br>congeners of <b>5</b>   | <b>24</b> | no                                                            | no <sup>b</sup> |
|                                          | <b>25</b> | no                                                            | no <sup>b</sup> |
|                                          | <b>26</b> | no                                                            | no <sup>b</sup> |
|                                          | <b>27</b> | no                                                            | no <sup>b</sup> |
|                                          | <b>28</b> | > 1                                                           | no <sup>b</sup> |
|                                          | <b>29</b> | no                                                            | no <sup>b</sup> |
|                                          | <b>30</b> | no                                                            | no <sup>b</sup> |
|                                          | <b>31</b> | no                                                            | no <sup>b</sup> |
|                                          | <b>32</b> | no                                                            | no <sup>b</sup> |
|                                          | <b>33</b> | no                                                            | no <sup>b</sup> |
|                                          | <b>34</b> | > 10                                                          | no <sup>b</sup> |

<sup>a</sup> highest tested concentration 100  $\mu\text{M}$  or 100  $\mu\text{g/mL}$  in case of extract or fraction.<sup>b</sup> highest tested concentration 10  $\mu\text{M}$ .

**Table S2. Interference of test compounds with hemagglutination (HA) of human erythrocytes.**

| code                                  | sample concentrations [ $\mu\text{M}$ ; extract/fraction in $\mu\text{g/mL}$ ] provoking in |                                             |                                                           |                                             |                                             |                                             |
|---------------------------------------|---------------------------------------------------------------------------------------------|---------------------------------------------|-----------------------------------------------------------|---------------------------------------------|---------------------------------------------|---------------------------------------------|
|                                       | viral HA assay                                                                              |                                             |                                                           | bacterial HA assay                          |                                             |                                             |
|                                       |                                                                                             | induction of hem-agglutination <sup>a</sup> | prevention of virus-induced hemagglutination <sup>b</sup> | induction of erythrocyte lysis <sup>c</sup> | induction of hem-agglutination <sup>d</sup> | induction of erythrocyte lysis <sup>e</sup> |
| multi-component mixtures              | MAE                                                                                         | 10-100                                      | no                                                        | no                                          | no                                          | no                                          |
|                                       | MAF                                                                                         | 3.16-100                                    | no                                                        | no                                          | no                                          | no                                          |
| natural product isolates              | <b>1</b>                                                                                    | 100 or no                                   | 31.6                                                      | 100 or no                                   | no                                          | 100                                         |
|                                       | <b>2</b>                                                                                    | no                                          | 3.1-100                                                   | 10-100                                      | no                                          | 31.6-100                                    |
|                                       | <b>3</b>                                                                                    | no                                          | no                                                        | 31.6-100                                    | no                                          | 100                                         |
|                                       | <b>4</b>                                                                                    | no                                          | 3.1-100                                                   | 10-100                                      | no                                          | 31.6-100                                    |
|                                       | <b>5</b>                                                                                    | no                                          | 100 or no                                                 | 100 or no                                   | no                                          | 100                                         |
|                                       | <b>6</b>                                                                                    | no                                          | 31.6                                                      | 100                                         | no                                          | 100                                         |
|                                       | <b>7</b>                                                                                    | no                                          | no                                                        | no                                          | no                                          | no                                          |
| non-prenylated congeners of <b>5</b>  | <b>8</b>                                                                                    | no                                          | no                                                        | no                                          | no                                          | no                                          |
|                                       | <b>9</b>                                                                                    | no                                          | no                                                        | no                                          | no                                          | no                                          |
|                                       | <b>10</b>                                                                                   | no                                          | no                                                        | no                                          | no                                          | no                                          |
|                                       | <b>11</b>                                                                                   | no                                          | no                                                        | no                                          | no                                          | no                                          |
|                                       | <b>12</b>                                                                                   | 10-100                                      | no                                                        | no                                          | no                                          | no                                          |
|                                       | <b>13</b>                                                                                   | no                                          | no                                                        | no                                          | no                                          | no                                          |
|                                       | <b>14</b>                                                                                   | 10-100                                      | no                                                        | no                                          | no                                          | no                                          |
|                                       | <b>15</b>                                                                                   | 3.16-100                                    | no                                                        | no                                          | no                                          | no                                          |
|                                       | <b>16</b>                                                                                   | no                                          | no                                                        | no                                          | 100                                         | no                                          |
|                                       | <b>17</b>                                                                                   | 100                                         | no                                                        | no                                          | no                                          | no                                          |
| mono-prenylated congeners of <b>5</b> | <b>18</b>                                                                                   | no                                          | no                                                        | no                                          | no                                          | no                                          |
|                                       | <b>19</b>                                                                                   | 100                                         | no                                                        | no                                          | no                                          | 31.6-100                                    |
|                                       | <b>20</b>                                                                                   | no                                          | no                                                        | 100 or no                                   | no                                          | 100 or no                                   |
|                                       | <b>21</b>                                                                                   | no                                          | no                                                        | no                                          | no                                          | no                                          |
|                                       | <b>22</b>                                                                                   | no                                          | no                                                        | no                                          | no                                          | no                                          |
|                                       | <b>23</b>                                                                                   | no                                          | no                                                        | no                                          | no                                          | no                                          |
| di-prenylated congeners of <b>5</b>   | <b>24</b>                                                                                   | no                                          | 100                                                       | no                                          | no                                          | 100                                         |
|                                       | <b>25</b>                                                                                   | no                                          | 31.6                                                      | 100 or no                                   | no                                          | 100                                         |
|                                       | <b>26</b>                                                                                   | 31.6-100                                    | no                                                        | 31.6-100                                    | no                                          | 100                                         |
|                                       | <b>27</b>                                                                                   | 10-100                                      | 3.16-100                                                  | no                                          | no                                          | 31.6-100                                    |
|                                       | <b>28</b>                                                                                   | no                                          | no                                                        | no                                          | no                                          | 100                                         |
|                                       | <b>29</b>                                                                                   | no                                          | 31.6-100                                                  | 100                                         | no                                          | 100                                         |
|                                       | <b>30</b>                                                                                   | 100 or no                                   | 10-100                                                    | no                                          | no                                          | 31.6-100                                    |
|                                       | <b>31</b>                                                                                   | no                                          | no                                                        | 31.6-100                                    | no                                          | 100                                         |
|                                       | <b>32</b>                                                                                   | no                                          | no                                                        | 31.6-100                                    | no                                          | 31.6-100                                    |
|                                       | <b>33</b>                                                                                   | 100                                         | no                                                        | no                                          | no                                          | no                                          |
|                                       | <b>34</b>                                                                                   | 10-100                                      | no                                                        | no                                          | no                                          | no                                          |

<sup>a</sup> Test compound induced a hemagglutination of human erythrocytes (2 h at 4 °C). <sup>b</sup> Test compound prevented the virus-induced hemagglutination of human erythrocytes (2 h at 4 °C). <sup>c</sup> Test compounds lysed the human erythrocytes (2 h at 4 °C). <sup>d</sup> Test compound induced a hemagglutination of human erythrocytes in the presence of lectin (24 h, 4 °C). <sup>e</sup> Test compounds lysed the human erythrocytes (4 h at 37 °C and 12 h at 4 °C).

**Table S3. Inhibition of influenza virus A/WSN/33 NA in fluorescence-based NA inhibition assay (FL assay) and cytopathic effect (CPE assay) in MDCK cells by the *M. alba* root bark MeOH extract (MAE), its fraction enriched with prenylated constituents (MAF), *M. alba* isolates, and congeners of sanggenol A (5).**

| code                                     |             | IC <sub>50</sub> [μM; extract/fraction in<br>μg/mL] in FL assay | IC <sub>50</sub> [μM; extract/fraction in<br>μg/mL] of CPE assay |
|------------------------------------------|-------------|-----------------------------------------------------------------|------------------------------------------------------------------|
| multi-component mixtures                 | MAE         | 62.0 ± 8.03 <sup>a</sup>                                        | 76.6 ± 2.58                                                      |
|                                          | MAF         | >1 <sup>a</sup>                                                 | 23.0 ± 3.44                                                      |
| natural product isolates                 | <b>1</b>    | 31.2 ± 10.1 <sup>a</sup>                                        | n.a.                                                             |
|                                          | <b>2</b>    | 9.18 ± 1.50 <sup>a</sup>                                        | n.a.                                                             |
|                                          | <b>3</b>    | 31.2 ± 10.1 <sup>a</sup>                                        | n.a.                                                             |
|                                          | <b>4</b>    | 61.7 ± 17.8 <sup>a</sup>                                        | 15.2 ± 14.0                                                      |
|                                          | <b>5</b>    | 65.5 ± 9.29 <sup>a</sup>                                        | 35.4 ± 14.6                                                      |
|                                          | <b>6</b>    | 37.2 ± 10.6 <sup>a</sup>                                        | 69.8 ± 6.81                                                      |
|                                          | <b>7</b>    | >1 <sup>a</sup>                                                 | n.a.                                                             |
| non-prenylated<br>congeners of <b>5</b>  | <b>8</b>    | >100                                                            | >100                                                             |
|                                          | <b>9</b>    | >100 <sup>a</sup>                                               | n.a.                                                             |
|                                          | <b>10</b>   | >100 <sup>a</sup>                                               | >100                                                             |
|                                          | <b>11</b>   | >100 <sup>a</sup>                                               | 68.4 ± 12.9                                                      |
|                                          | <b>12</b>   | 77.7 ± 5.56                                                     | 81.3 ± 10.4                                                      |
|                                          | <b>13</b>   | 76.8 ± 9.64                                                     | >100                                                             |
|                                          | <b>14</b>   | >100 <sup>a</sup>                                               | >100                                                             |
|                                          | <b>15</b>   | >100                                                            | n.a.                                                             |
|                                          | <b>16</b>   | 62.0 ± 8.03 <sup>a</sup>                                        | >100                                                             |
|                                          | <b>17</b>   | 9.18 ± 1.50 <sup>a</sup>                                        | >100                                                             |
| mono-prenylated<br>congeners of <b>5</b> | <b>18</b>   | >100                                                            | 11.4 ± 3.00                                                      |
|                                          | <b>19</b>   | >100                                                            | n.a.                                                             |
|                                          | <b>20</b>   | >100                                                            | n.a.                                                             |
|                                          | <b>21</b>   | 45.54 ± 6.06                                                    | n.a.                                                             |
|                                          | <b>22</b>   | >100                                                            | n.a.                                                             |
|                                          | <b>23</b>   | 27.0 ± 3.24                                                     | n.a.                                                             |
| di-prenylated<br>congeners of <b>5</b>   | <b>24</b>   | >100                                                            | n.a.                                                             |
|                                          | <b>25</b>   | 41.4 ± 6.98                                                     | n.a.                                                             |
|                                          | <b>26</b>   | 63.9 ± 11.1                                                     | n.a.                                                             |
|                                          | <b>27</b>   | 33.1 ± 11.7                                                     | n.a.                                                             |
|                                          | <b>28</b>   | >100 <sup>a</sup>                                               | n.a.                                                             |
|                                          | <b>29</b>   | 53.1 ± 17.5                                                     | n.a.                                                             |
|                                          | <b>30</b>   | 62.5 ± 5.40                                                     | n.a.                                                             |
|                                          | <b>31</b>   | 37.9 ± 14.6                                                     | n.a.                                                             |
|                                          | <b>32</b>   | 26.9 ± 1.85                                                     | n.a.                                                             |
|                                          | <b>33</b>   | 97.7 ± 0.46                                                     | n.a.                                                             |
|                                          | <b>34</b>   | >100 <sup>a</sup>                                               | n.a.                                                             |
| control                                  | oseltamivir | 0.0016 ± 0.0001                                                 | n.d.                                                             |

<sup>a</sup> Compounds exerted self-FL at certain concentrations (see Table S1). n.a. not active at noncytotoxic concentrations in MDCK cells (Table 2). The highest tested concentration was 100 μg/mL or 100 μM for extracts and compounds, respectively. n.d. not determined

**Table S4. Product numbers, Chemical Abstracts Service (CAS) registry numbers, and names of investigated congeners of sanggenol A (5).**

| code | product number<br>(AnalytiCon<br>Discovery) | CAS registry<br>number | name                                                                                                         |
|------|---------------------------------------------|------------------------|--------------------------------------------------------------------------------------------------------------|
| 8    | NP-001206                                   | 211178-43-7            | 2,3-dihydro-5,7-dihydroxy-6-methoxy-2-phenyl-4H-1-benzopyran-4-one                                           |
| 9    | NP-001581                                   | 69097-98-9             | (±)-homoeriodictyol                                                                                          |
| 10   | NP-003773                                   | 69097-99-0             | (±)-hesperetin                                                                                               |
| 11   | NP-001578                                   | 4049-38-1              | (±)-eriodictyol                                                                                              |
| 12   | NP-012970                                   | 121694-88-0            | 2',4',5,7-tetrahydroxyflavanone                                                                              |
| 13   | NP-013702                                   | 80366-15-0             | 3,5,7,2',6'-pentahydroxyflavanone                                                                            |
| 14   | NP-012592                                   | 144707-17-5            | 2',3',4',5,7-pentahydroxyflavone                                                                             |
| 15   | NP-000380                                   | 491-70-3               | luteolin                                                                                                     |
| 16   | NP-010620                                   | 480-16-0               | morin                                                                                                        |
| 17   | NP-004431                                   | 36804-17-8             | (±)-silybin                                                                                                  |
| 18   | NP-013030                                   | 886620-61-7            | (±)-abyssinone II                                                                                            |
| 19   | NP-010957                                   | 913691-36-8            | INDEX NAME NOT YET ASSIGNED                                                                                  |
| 20   | NP-002011                                   | 93766-65-5             | 4',5,7-trihydroxy-3'-prenylflavanone                                                                         |
| 21   | NP-012960                                   | 183997-08-2            | 2,3-dihydro-5,7-dihydroxy-2-[4-hydroxy-3-methoxy-5-(3-methyl-2-butenyl)phenyl]-4H-1-benzopyran-4-one         |
| 22   | NP-003517                                   | 1083197-70-9           | 2,3-dihydro-5,7-dihydroxy-2-(4-hydroxy-3-methoxyphenyl)-6-(3-methyl-2-buten-1-yl)-4H-1-benzopyran-4-one      |
| 23   | NP-005230                                   | 1246094-70-1           | (2R,3R)-rel-4H-2,3-dihydro-3,5,7-trihydroxy-2-(4-hydroxyphenyl)-8-(3-methyl-2-buten-1-yl)-1-benzopyran-4-one |
| 24   | NP-015140                                   | 67832-07-9             | (R,S)-8-geranyl-5,7-dihydroxyflavanone                                                                       |
| 25   | NP-009005                                   | 910619-01-1            | INDEX NAME NOT YET ASSIGNED                                                                                  |
| 26   | NP-009004                                   | 96917-35-0             | bonanniol A                                                                                                  |
| 27   | NP-012357                                   | 201480-12-8            | abyssinone-V 4'-methyl ether                                                                                 |
| 28   | NP-000563                                   | 68236-11-3             | 6,8-diprenylnaringenin                                                                                       |
| 29   | NP-006454                                   | 952647-85-7            | 2-(3,5-dihydroxyphenyl)-2,3-dihydro-5,7-dihydroxy-6,8-bis(3-methyl-2-buten-1-yl)-4H-1-benzopyran-4-one       |
| 30   | NP-001083                                   | 51225-28-6             | 6,8-diprenylgenistein                                                                                        |
| 31   | NP-013070                                   | 66777-70-6             | 6,8-diprenylorobol                                                                                           |
| 32   | NP-012233                                   | 211183-29-8            | orientanol E                                                                                                 |
| 33   | NP-016087                                   | 1246094-68-7           | 2,4-bis(3-methyl-2-buten-1-yl)-5-(2-phenylethyl)-1,3-benzenediol                                             |
| 34   | NP-018637                                   | 28233-35-4             | atalphylline                                                                                                 |

**Figure S1. HPLC analysis of the *M. alba* root bark MeOH extract (MAE) (A), its fraction enriched with prenylated constituents (MAF) (B), and a decoction (MAD) (C) produced according to the traditional Chinese medicine.**

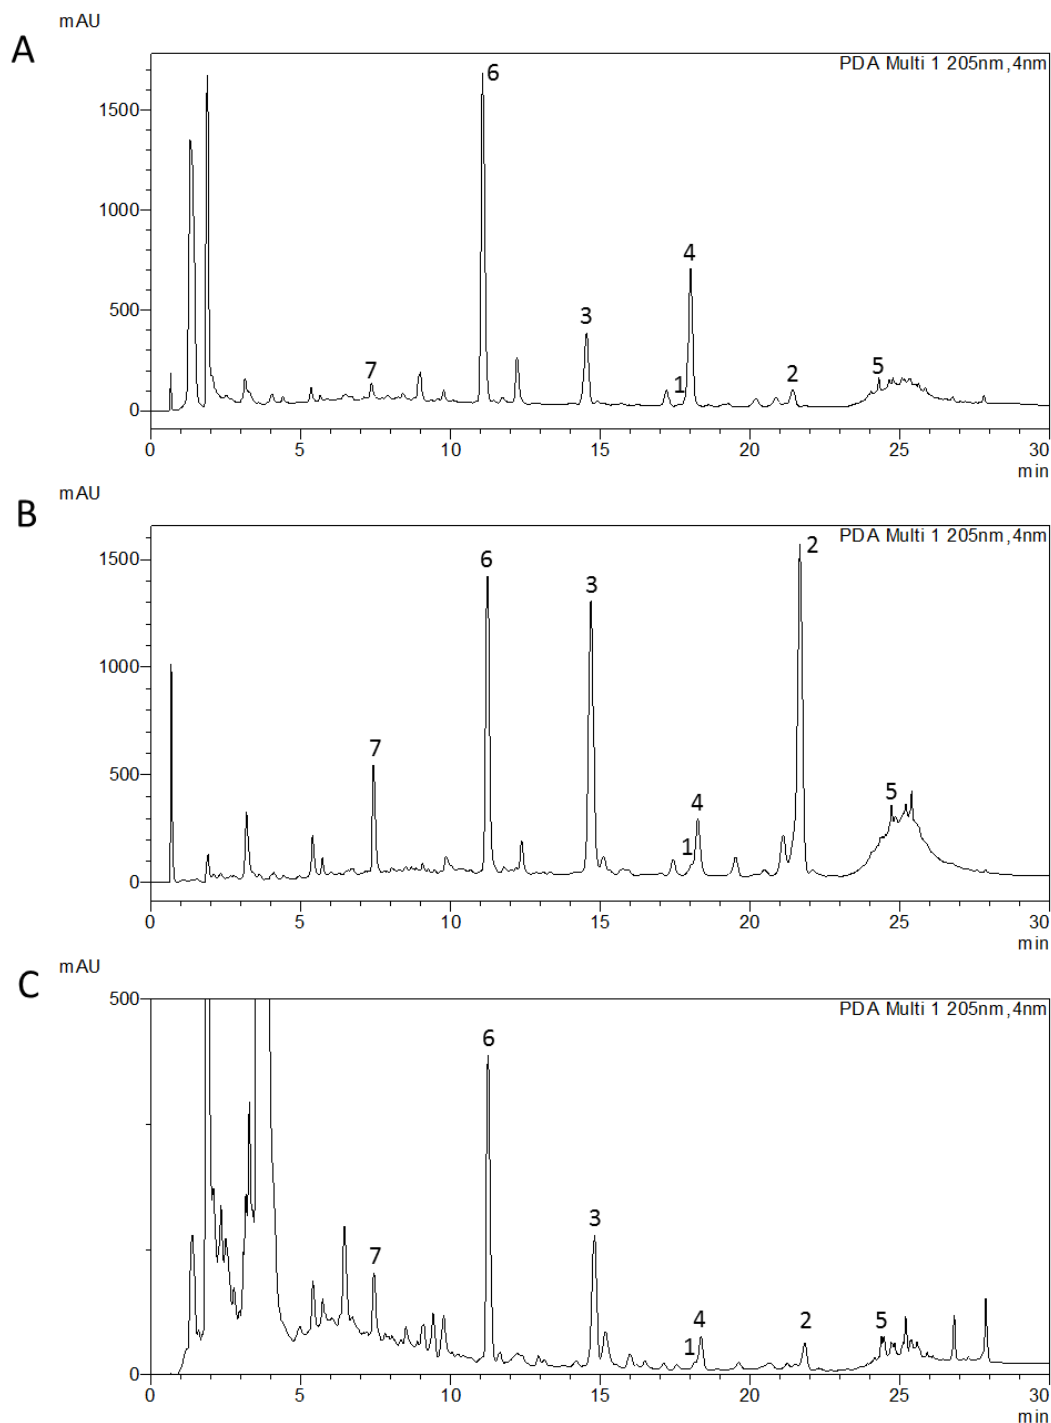

HPLC was performed on Shimadzu device consisting of an LC-10ADVP solvent delivery system, a FCV-10ALVP low-pressure gradient flow control valve, an SCL-10AVP system controller, a DGU-14A degasser, and a SPD-M20A photodiode array (PDA) detector. LC-parameters: stationary phase: Agilent Zorbax SB-C18 3.5 $\mu$ m (150 x 4.6 mm); temperature: 25  $^{\circ}$ C; mobile phase: A = water; B = acetonitrile; flow rate 1.0 mL/min; PDA detection wavelength: 205 nm; injection volume: 10  $\mu$ L; Separations were performed by gradient elution (70/30 A/B in 5 min to 55/45 A/B, then within 15 min to 45/55 A/B, and within 2 min to 2/98 A/B), followed by a 10 min column wash (2A/98B) and a re-equilibration period of 10 min. All chemicals and solvents used were analytical grade.
